# Supplementary figures and images for: Host Immune Response Modulation in Avian Coronavirus Infection: Tracheal Transcriptome Profiling In Vitro and In Vivo
Source: MDPI journal article supplement (doi:10.3390/v16040605), 2024-04-14

(a)

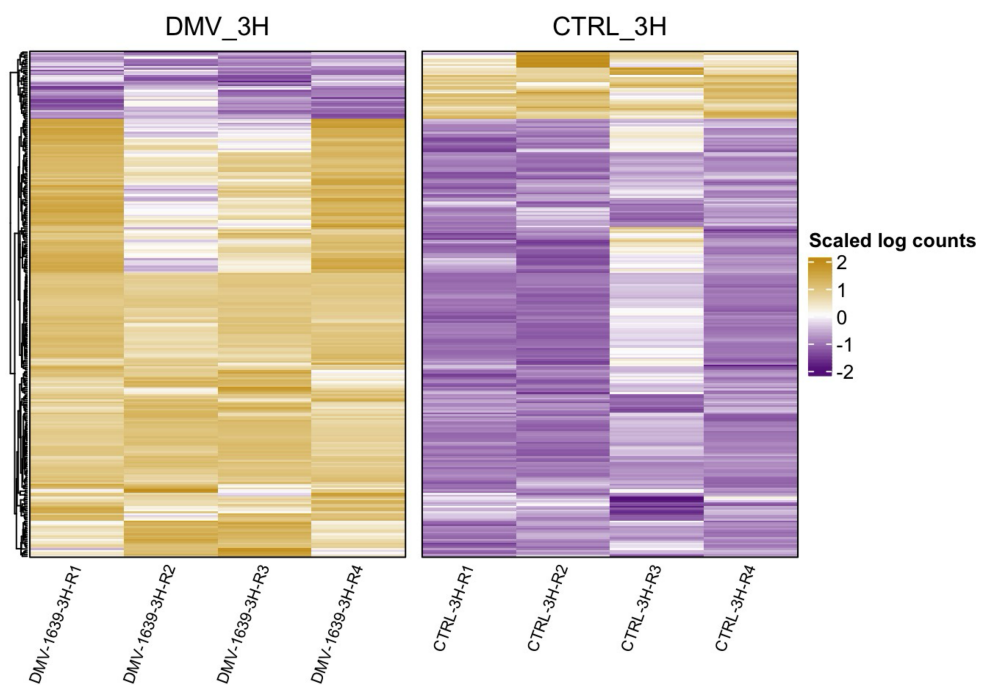

(b)

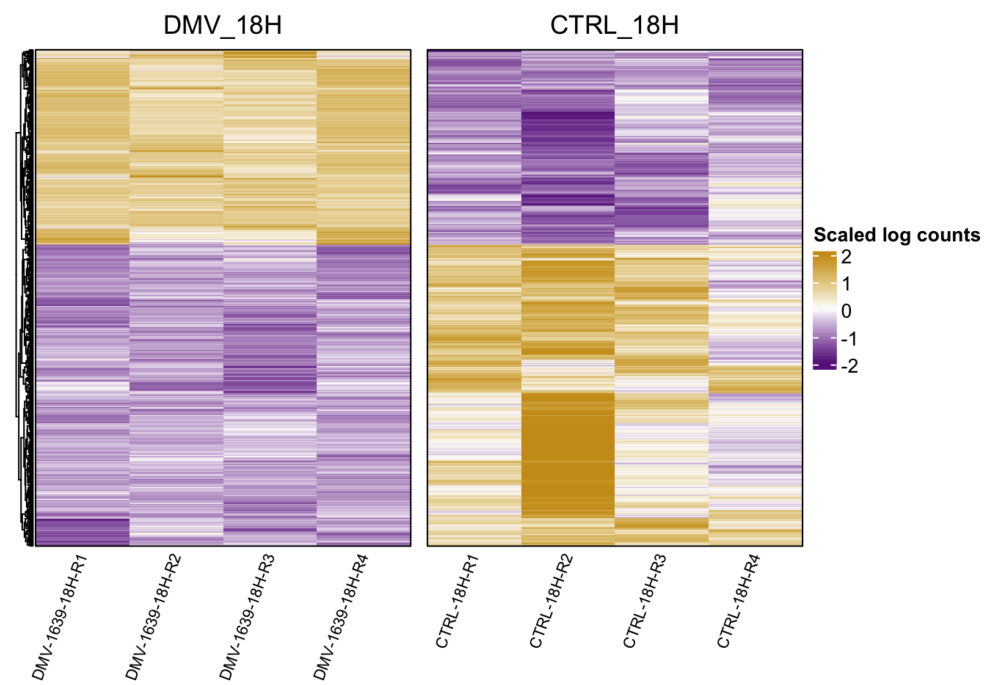

(c)

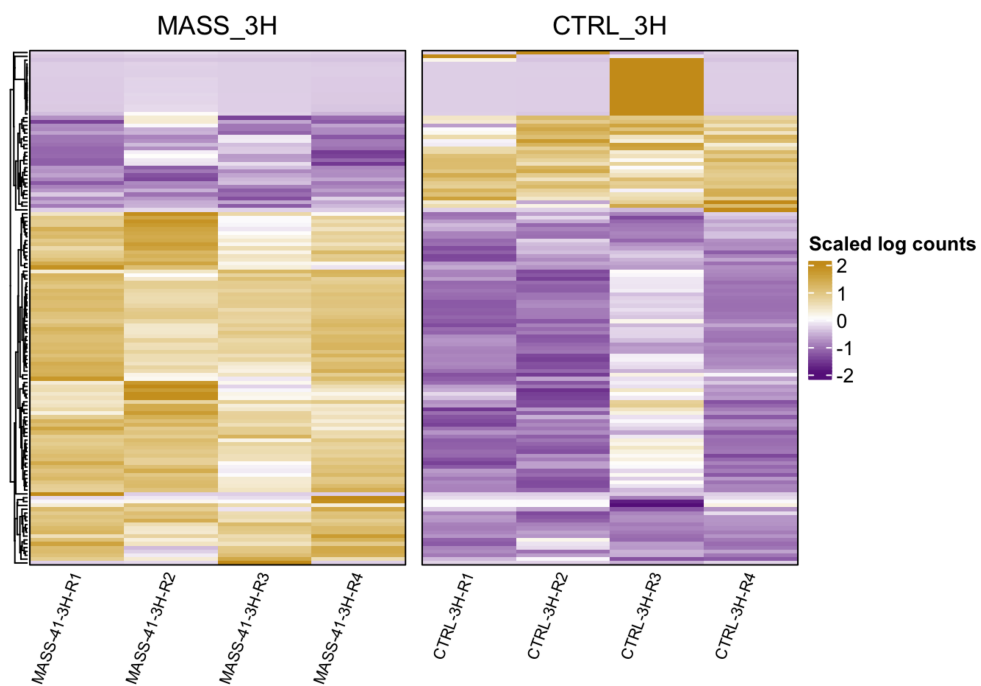

(d)

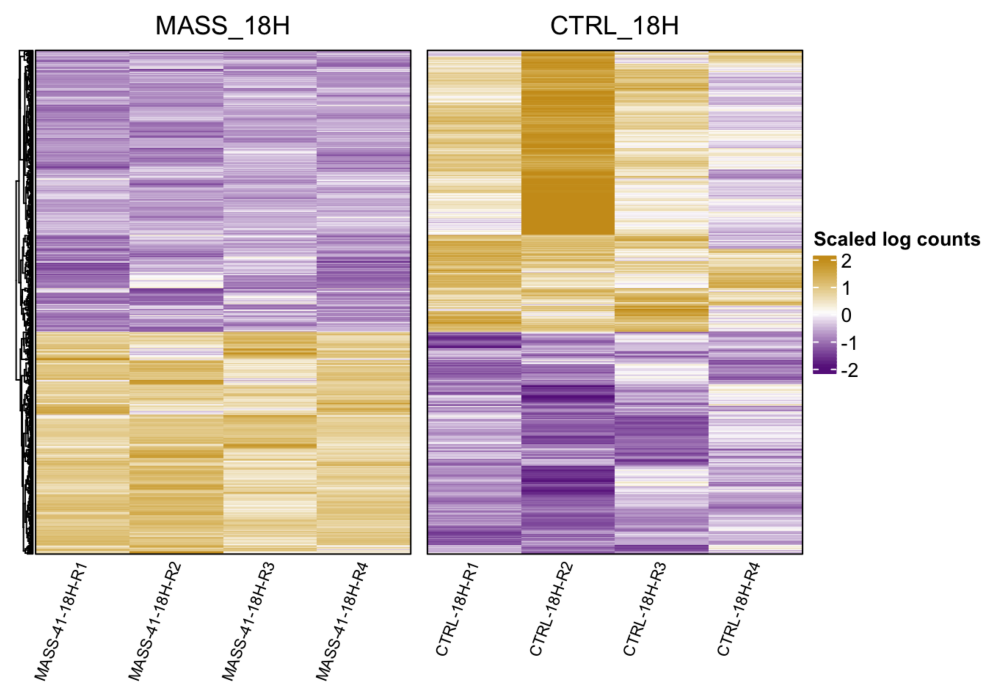

Supplement: s1 [file s1]

(a)

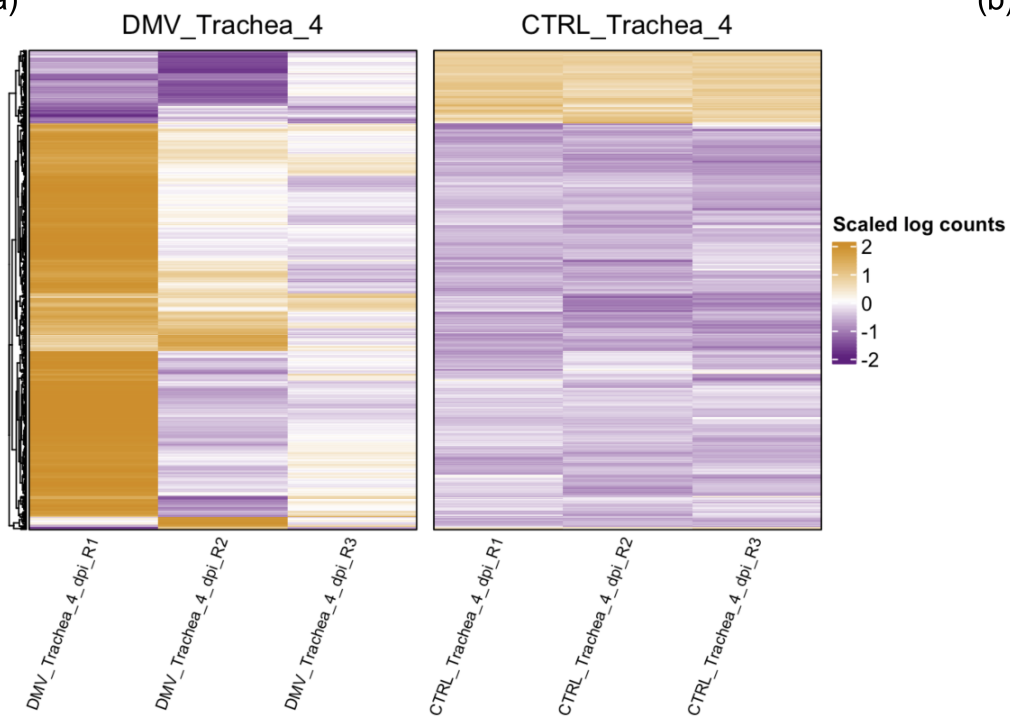

(b)

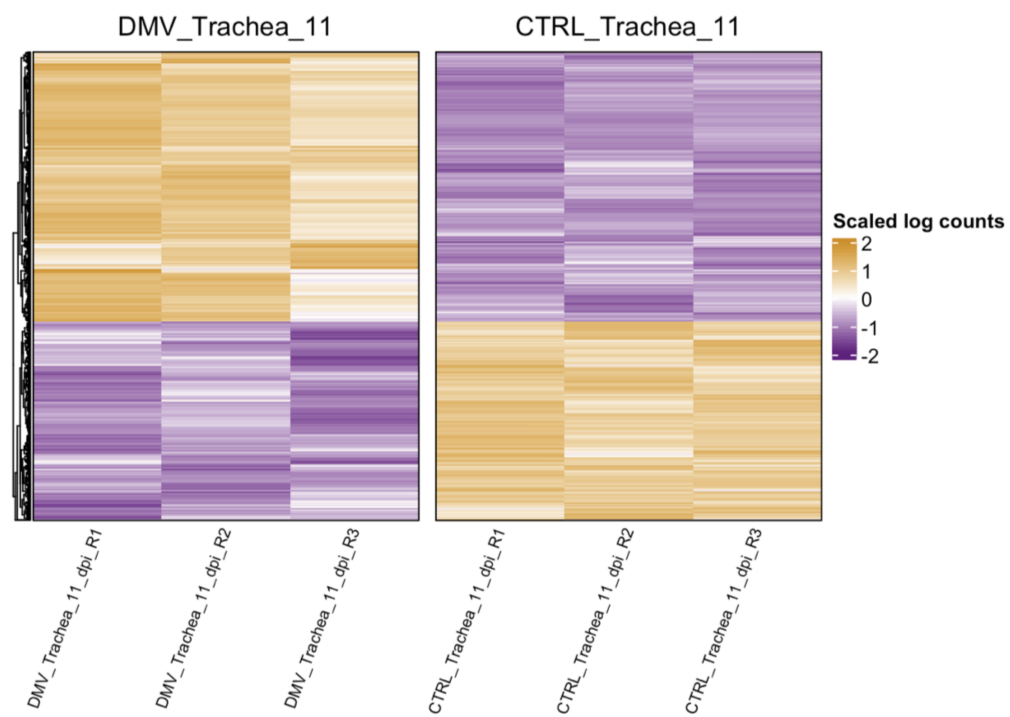

(c)

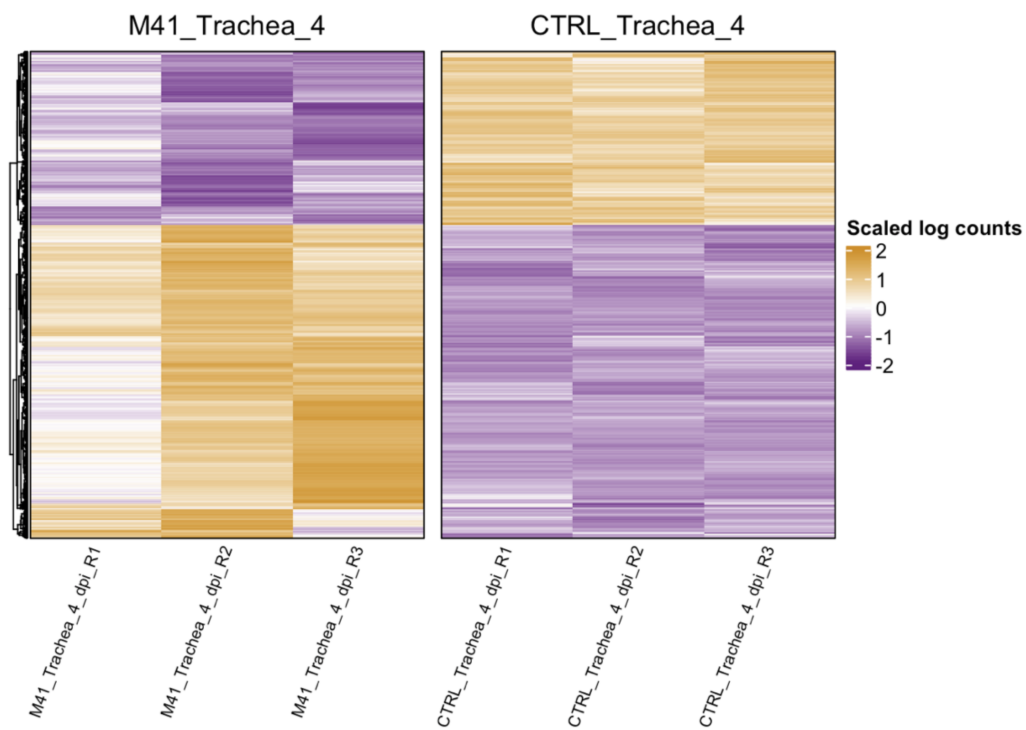

(d)

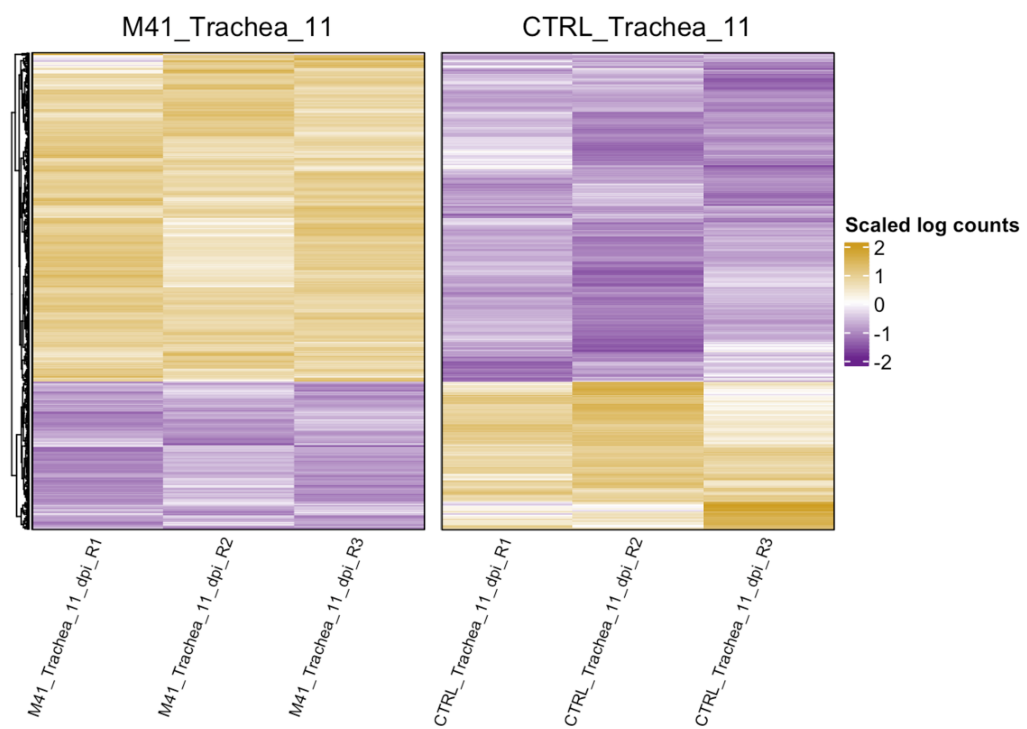

Supplement: s1 [file s1]
